# Supplementary material for: The Acer truncatum genome provides insights into nervonic acid biosynthesis
Source: PubMed Central journal article supplement (PMC7702125; doi:10.1111/tpj.14954), 2020-10-02
Supplement: TPJ-104-662-s002.pdf [file TPJ-104-662-s002.pdf]

# **The *Acer truncatum* genome provides insights into the nervonic acid biosynthesis**

## **Supplementary information**

**This document includes the following:  
- 28 supplementary tables**

### **Supplementary Table Legends**

**Table S1. K-mer statistics of *A. truncatum*.**

**Table S2. Sequencing data of *A. truncatum*.**

**Table S3. Summary of *A. truncatum* pseudomolecules.**

**Table S4. The Hi-c assemble results of *A. truncatum*.**

**Table S5. Coverage statistics of the *A. truncatum* genome.**

**Table S6. CEGMA evaluation results.**

**Table S7. BUSCO notation assessment of *A. truncatum* genome and annotation.**

**Table S8. Assessing the gene region assembly by mapping RNA assembly to *A. truncatum* genome.**

**Table S9. Statistical results of gene functional annotations.**

**Table S10. Statistical results of non-coding RNAs.**

**Table S11. Classification of repetitive elements in the *A. truncatum* genome.**

**Table S12. The LTR subfamilies in *A. truncatum* and other published genomes.**

**Table S13. The seed sequences of centromeric regions of *A. truncatum* and *A. yangbiense* chromosomes.**

**Table S14. Details of the chloroplast genome sequences used for the phylogenetic analysis.**

**Table S15. Go enrichment results for expanded genes in *A. truncatum*.**

**Table S16. Go enrichment results for contracted genes in *A. truncatum*.**

**Table S17. Go enrichment results for the genes in *A. truncatum*-specific gene families.**

**Table S18. KEGG enrichment results for expanded genes in *A. truncatum*.**

**Table S19. Go enrichment results for expanded genes in *A. yangbiense*.**

**Table S20. Go enrichment results for contracted genes in *A. yangbiense*.**

**Table S21. KEGG enrichment results for expanded genes in *A. yangbiense*.**

**Table S22. A summary of Drought-tolerant genes identified in *A. truncatum* and other published genomes.**

**Table S23. A summary of drought-tolerant transcription factors identified in *A. truncatum* and other published genomes.**

**Table S24. The gene copy number of VLCFA biosynthesis in 12 plants.**

**Table S25. Expression levels significantly up-regulated between 85 DAF and 100DAF in the fatty acid elongation stage of the VLCFA biosynthesis pathway.**

**Table S26. The transcription factors (TF)/transcription regulatory factors (TR) in black module of WGCNA analysis.**

**Table S27. List of *KCS* gene-specific primer (5' - 3') used for real-time RT-PCR.**

**Table S28. List of *LEA* gene-specific primer (5' - 3') used for real-time RT-PCR.**

**Table S1. K-mer statistics of *A. truncatum*.**

| K-mer | K-mer number   | K-mer Depth | Genome Size (Mbp) | Revised Genome Size (Mbp) | Heterozygous Ratio (%) | Repeat (%) |
|-------|----------------|-------------|-------------------|---------------------------|------------------------|------------|
| 17    | 50,317,377,088 | 76          | 662.08            | 653.44                    | 1.12                   | 61.70      |

**Table S2. Sequencing data of *A. truncatum*.**

| Paired-end libraries | Insert size | Total data (G) | Sequence coverage (X)* |
|----------------------|-------------|----------------|------------------------|
| Illumina reads       | 350 bp      | 117.93         | 180.48                 |
| PacBio long reads    | 20kb        | 75.7           | 115.85                 |
| 10X Genomics         | -           | 81.54          | 124.79                 |
| Hi-C reads           | -           | 72.21          | 110.51                 |
| Total                | -           | 347.38         | 531.63                 |

\* 653.44M genome size estimated by survey.

**Table S3. Summary of *A. truncatum* pseudomolecules.**

| Chromosome | Length(bp)           | Gene number     | Gap base (N) |
|------------|----------------------|-----------------|--------------|
| chr1       | 70,314,080           | 2,754           | 463,938      |
| chr2       | 67,888,635           | 2,427           | 647,076      |
| chr3       | 67,579,682           | 2,985           | 442,334      |
| chr4       | 49,301,835           | 2,029           | 375,130      |
| chr5       | 48,765,855           | 2,619           | 250,582      |
| chr6       | 46,359,076           | 2,521           | 369,439      |
| chr7       | 43,170,434           | 1,920           | 268,073      |
| chr8       | 41,982,645           | 1,871           | 160,723      |
| chr9       | 40,653,649           | 1,864           | 248,943      |
| chr10      | 40,269,369           | 1,570           | 423,772      |
| chr11      | 39,201,709           | 1,954           | 280,111      |
| chr12      | 37,356,478           | 1,851           | 263,834      |
| chr13      | 36,914,844           | 1,925           | 244,204      |
| Total      | 629,758,291 (99.44%) | 28,290 (99.48%) | 4,448,159    |

The rest of scaffolds unanchored to chromosome are not listed.

**Table S4. The Hi-c assemble results of *A.truncatum*.**

|                 | length        |               | number   |          |
|-----------------|---------------|---------------|----------|----------|
|                 | Contig** (bp) | Scaffold (bp) | Contig** | Scaffold |
| Total           | 628,843,326   | 633,281,485   | 1,453    | 34       |
| Max             | 4,570,384     | 70,314,080    | —        | —        |
| Number > = 2000 | —             | —             | 1,453    | 34       |
| N50             | 773,169       | 46,359,076    | 239      | 6        |
| N60             | 605,964       | 43,170,434    | 330      | 7        |
| N70             | 455,890       | 40,653,649    | 450      | 9        |
| N80             | 321,326       | 40,269,369    | 614      | 10       |
| N90             | 196,874       | 37,356,478    | 859      | 12       |

\*\*Contig after scaffolding

**Table S5. Coverage statistics of the *A. truncatum* genome.**

| -                         | Percentage |
|---------------------------|------------|
| Mapping rate (%)          | 97.24      |
| Coverage (%)              | 99.47      |
| Coverage at least 4X (%)  | 99.34      |
| Coverage at least 10X (%) | 99.25      |
| Coverage at least 20X (%) | 99.11      |

Average sequence depth: The average depth of each base in the genome that is covered by the reads. Coverage: The proportion of the genome covered by the reads.

**Table S6. CEGMA evaluation results.**

| Complete |                | Complete + partial |                |
|----------|----------------|--------------------|----------------|
| # Prots  | % Completeness | # Prots            | % Completeness |
| 232      | 93.55          | 239                | 96.37          |

Complete: core genes that were completely assembled with identity greater than 0.7.

Partial: core genes that were assembled but not complete.

# Prots: the number of core genes.

% Completeness: percentage of assembled core genes to core genes.

**Table S7. BUSCO notation assessment of *A. truncatum* genome and annotation.**

| BUSCO                | Genome             |          | Proteins |          |
|----------------------|--------------------|----------|----------|----------|
|                      | Count              | Ratio(%) | Count    | Ratio(%) |
| Complete BUSCOs      | 1342               | 93.2     | 1395     | 96.9     |
| Complete BUSCOs      | sigle-copy<br>1275 | 88.5     | 1240     | 86.1     |
| Complete BUSCOs      | duplicated<br>68   | 4.7      | 155      | 10.8     |
| Fragmented BUSCOs    | 18                 | 1.3      | 30       | 2.1      |
| Missing BUSCOs       | 79                 | 5.5      | 15       | 1        |
| Total BUSCO serached | group<br>1440      |          | 1440     |          |

**Table S8. Assessing the gene region assembly by mapping RNA assembly to *A. truncatum* genome.**

| Dataset | Number  | Total (bp)  | Sequences with >90% sequence in with >50% sequence in |        |         |         |         |
|---------|---------|-------------|-------------------------------------------------------|--------|---------|---------|---------|
|         |         |             | length covered by one scaffold assembly (%)           | Number | Percent | Number  | Percent |
| >500bp  | 106,055 | 178,432,686 | 95.97                                                 | 94,327 | 88.94   | 100,924 | 95.16   |
| >1000bp | 67,579  | 151,355,839 | 99.40                                                 | 62,942 | 93.14   | 66,919  | 99.02   |
| >2000bp | 31,334  | 98,869,172  | 99.77                                                 | 29,229 | 93.28   | 31,133  | 99.36   |
| >5000bp | 2,133   | 13,361,783  | 99.86                                                 | 1,911  | 89.59   | 2,107   | 98.78   |



**Table S9. Statistical results of gene functional annotations.**

|              | Number | Percent (%) |
|--------------|--------|-------------|
| Total        | 28,438 | -           |
| Swiss-Prot   | 21,289 | 74.86       |
| NR           | 27,202 | 95.65       |
| KEGG         | 21,276 | 74.81       |
| IterPro      | 27,826 | 97.84       |
| GO           | 25,432 | 89.43       |
| Pfam         | 21,579 | 75.87       |
| Annotated    | 28,023 | 98.54       |
| Un-annotated | 415    | 0.01        |

**Table S10. Statistical results of non-coding RNAs.**

| Type  | Copy     | Average length (bp) | Total length (bp) | (% ) of genome |          |
|-------|----------|---------------------|-------------------|----------------|----------|
| miRNA | 1,345    | 132.48              | 178,186           | 0.028137       |          |
| tRNA  | 744      | 75.11               | 55,883            | 0.008824       |          |
| rRNA  | rRNA     | 368                 | 169.31            | 62,307         | 0.009839 |
|       | 18S      | 54                  | 497.61            | 26,871         | 0.004243 |
|       | 28S      | 42                  | 125.14            | 5,256          | 0.00083  |
|       | 5.8S     | 15                  | 123.46            | 1,852          | 0.000292 |
|       | 5S       | 257                 | 110.23            | 28,328         | 0.004473 |
| snRNA | snRNA    | 868                 | 113               | 98,086         | 0.015489 |
|       | CD-box   | 655                 | 102.54            | 67,164         | 0.010606 |
|       | HACA-box | 51                  | 139/82            | 7,131          | 0.001126 |
|       | Splicing | 160                 | 147.04            | 23,526         | 0.003715 |

**Table S11. Classification of repetitive elements in the *A. truncatum* genome.**

| Type           | Length (bp) | Percentage of genome (%) |
|----------------|-------------|--------------------------|
| DNA            | 48,529,125  | 7.66                     |
| LINE           | 33,244,458  | 5.24                     |
| SINE           | 281,678     | 0.04                     |
| LTR            | 287,494,231 | 45.4                     |
| LTR/Copia      | 163,812,683 | 25.87                    |
| LTR/Gypsy      | 99,823,924  | 15.76                    |
| Tandem repeats | 29,043,401  | 4.59                     |
| Satellite      | 1,088,584   | 0.17                     |
| Simple repeats | 4,660,170   | 0.74                     |
| Unknown        | 20,698,204  | 3.27                     |
| Total          | 391,045,082 | 61.75                    |

The total length of all repetitive elements is the result of removing redundancy

**Table S12. The LTR subfamilies in *A. truncatum* and other published genomes.**

| superfamily    | family       | number in<br><i>A. truncatum</i> | number<br><i>A.yangbiense</i> | in number<br><i>C. sinensis</i> | in number<br><i>M. oleifera</i> |
|----------------|--------------|----------------------------------|-------------------------------|---------------------------------|---------------------------------|
| Ty3/Gypsy      | reina        | 260                              | 210                           | 161                             | 57                              |
| Ty3/Gypsy      | tat          | 1,789                            | 1,831                         | 271                             | 1,162                           |
| Ty3/Gypsy      | athila       | 1,094                            | 676                           | 751                             | 2,045                           |
| Ty3/Gypsy      | crm          | 506                              | 463                           | 118                             | 544                             |
| Ty3/Gypsy      | galadriel    | 36                               | 23                            | 48                              | 928                             |
| Ty3/Gypsy      | del          | 13                               | 10                            | 62                              | 10,005                          |
| Ty1/Copia      | sire         | 1,727                            | 6,624                         | 321                             | 8,373                           |
| Ty1/Copia      | tork         | 2,200                            | 1,772                         | 668                             | 2,379                           |
| Ty1/Copia      | retrofit     | 1,269                            | 924                           | 425                             | 1,838                           |
| Ty1/Copia      | oryco        | 262                              | 212                           | 103                             | 498                             |
| Caulimoviridae | caulimovirus | 43                               | 96                            | 181                             | 94                              |
| Caulimoviridae | badnavirus   | 8                                | 11                            | 27                              | 8                               |
| Caulimoviridae | soymovirus   | 2                                | 1                             | 6                               | 1                               |
| Caulimoviridae | cavemovirus  | 0                                | 2                             | 5                               | 8                               |
| Unclassified   |              | 835                              | 661                           | 47                              | 125                             |
| <b>Total</b>   |              | <b>10,044</b>                    | <b>13,516</b>                 | <b>3,194</b>                    | <b>28,065</b>                   |

**Table S13. The seed sequences of **putative** centromeric regions of *A. truncatum* and *A. yangbiense* chromosomes.**

| Species              | Monomer sequence                                                                                                                                                              | Length | GC(%) |
|----------------------|-------------------------------------------------------------------------------------------------------------------------------------------------------------------------------|--------|-------|
| <i>A. truncatum</i>  | GAAGTAAGGAACCAGGTACCCCGATGAGGCATCCCGATCTTA<br>CTGTAAGTCTGTCCTGGTAGGCAACTAAGGCCACTTTAGCACC<br>AGGCTTCTTGAGGAGGGTATTCCCCGACCAAGGCAGCAGGA<br>GCGCCATAAGGCTATTTCCCTGGTCTTGAAATGGC | 161    | 53    |
| <i>A. yangbiense</i> | CTTTTTGGAATGCAAACCTTCTTTTTGGCATGCGGGCATGCTTT<br>TTTGAATGCGAGAGTGGTTTTTAGCTCTCGAGCGTGCTTTTTA<br>GTTTCCAAACGTTCTTTTTGGCTTTCGGGCGTTCTTTTTTGCAA<br>GCAAACCTTCTTTTTGGCTTTTGGGCGTT  | 160    | 41.25 |

**Table S14. Details of the chloroplast genome sequences used for the phylogenetic analysis.**

| No. | Taxon                          | Family      | Order      | GenBank<br>Accession number |
|-----|--------------------------------|-------------|------------|-----------------------------|
| 1   | <i>Acer yangbiense</i>         | Aceraceae   | Sapindales | MK479229                    |
| 2   | <i>Acer wilsonii</i>           | Aceraceae   | Sapindales | NC_040988                   |
| 3   | <i>Acer triflorum</i>          | Aceraceae   | Sapindales | NC_047296                   |
| 4   | <i>Acer takesimense</i>        | Aceraceae   | Sapindales | NC_046488                   |
| 5   | <i>Acer sino-oblongum</i>      | Aceraceae   | Sapindales | NC_040106                   |
| 6   | <i>Acer pseudosieboldianum</i> | Aceraceae   | Sapindales | NC_046487                   |
| 7   | <i>Acer laevigatum</i>         | Aceraceae   | Sapindales | NC_042443                   |
| 8   | <i>Acer fenzelianum</i>        | Aceraceae   | Sapindales | NC_045527                   |
| 9   | <i>Acer catalpifolium</i>      | Aceraceae   | Sapindales | MK479218                    |
| 10  | <i>Dipteronia dyeriana</i>     | Sapindaceae | Sapindales | NC_031899                   |
| 11  | <i>Dipteronia sinensis</i>     | Sapindaceae | Sapindales | NC_029338                   |
| 12  | <i>Acer buergerianum</i>       | Aceraceae   | Sapindales | NC_034744                   |
| 13  | <i>Acer davidii</i>            | Aceraceae   | Sapindales | NC_030331                   |
| 14  | <i>Acer griseum</i>            | Aceraceae   | Sapindales | NC_034346                   |
| 15  | <i>Acer miaotaiense</i>        | Aceraceae   | Sapindales | NC_030343                   |
| 16  | <i>Acer morrisonense</i>       | Aceraceae   | Sapindales | KT970611                    |
| 17  | <i>Acer truncatum</i>          | Aceraceae   | Sapindales | MH638284                    |
| 18  | <i>Dimocarpus longan</i>       | Sapindaceae | Sapindales | NC_037447                   |

**Table S15. Go enrichment results for expanded genes in *A. truncatum*.**

| GO_ID      | GO_Term                                 | GO_Class | Pvalue      | AdjustedPv  | Gene_Number |
|------------|-----------------------------------------|----------|-------------|-------------|-------------|
| GO:0005515 | protein binding                         | MF       | 0.001959647 | 0.040608303 | 299         |
|            | oxidoreductase activity, acting on      |          |             |             |             |
| GO:0016705 | paired donors, with incorporation or    | MF       | 0.001401486 | 0.032359948 | 61          |
|            | reduction of molecular oxygen           |          |             |             |             |
| GO:0043531 | ADP binding                             | MF       | 3.38831E-66 | 6.10235E-63 | 56          |
| GO:0016746 | transferase activity, transferring acyl | MF       | 9.09257E-11 | 4.09393E-08 | 48          |
|            | groups                                  |          |             |             |             |
| GO:0030246 | carbohydrate binding                    | MF       | 6.41451E-37 | 5.77627E-34 | 46          |
| GO:0016747 | transferase activity, transferring acyl | MF       | 1.80621E-14 | 1.08433E-11 | 42          |
|            | groups other than amino-acyl groups     |          |             |             |             |
| GO:0044283 | small molecule biosynthetic process     | BP       | 0.000187938 | 0.007051585 | 37          |
| GO:0046394 | carboxylic acid biosynthetic process    | BP       | 3.0831E-05  | 0.001914714 | 36          |
| GO:0046983 | protein dimerization activity           | MF       | 0.001604763 | 0.03628026  | 31          |
| GO:0005618 | cell wall                               | CC       | 2.47237E-07 | 4.94748E-05 | 22          |
| GO:0006631 | fatty acid metabolic process            | BP       | 7.6302E-06  | 0.000654381 | 22          |
| GO:0006633 | fatty acid biosynthetic process         | BP       | 9.51125E-07 | 0.000171298 | 21          |
| GO:0005976 | polysaccharide metabolic process        | BP       | 0.001631705 | 0.03628026  | 21          |
| GO:0044264 | cellular polysaccharide metabolic       | BP       | 0.000204111 | 0.00750212  | 20          |
|            | process                                 |          |             |             |             |
| GO:0006073 | cellular glucan metabolic process       | BP       | 4.57111E-05 | 0.002007944 | 19          |
| GO:0004983 | neuropeptide Y receptor activity        | MF       | 0.00161711  | 0.03628026  | 14          |
| GO:0016903 | oxidoreductase activity, acting on      | MF       | 3.44434E-06 | 0.000345239 | 13          |
|            | the aldehyde or oxo group of donors     |          |             |             |             |
| GO:0000160 | phosphorelay signal transduction        | BP       | 3.84716E-05 | 0.002007944 | 13          |
|            | system                                  |          |             |             |             |
| GO:0044703 | multi-organism reproductive process     | BP       | 0.000406762 | 0.011099665 | 12          |
| GO:0016762 | xyloglucan:xyloglucosyl transferase     | MF       | 9.98602E-09 | 2.2481E-06  | 11          |
|            | activity                                |          |             |             |             |
| GO:0048046 | apoplast                                | CC       | 9.98602E-09 | 2.2481E-06  | 11          |
| GO:0004176 | ATP-dependent peptidase activity        | MF       | 3.40201E-09 | 1.02117E-06 | 10          |
| GO:0008408 | 3'-5' exonuclease activity              | MF       | 8.64985E-06 | 0.000688866 | 9           |
| GO:0010333 | terpene synthase activity               | MF       | 0.000173781 | 0.006659156 | 9           |
| GO:0009067 | aspartate family amino acid             | BP       | 0.000173781 | 0.006659156 | 9           |
|            | biosynthetic process                    |          |             |             |             |
| GO:0016570 | histone modification                    | BP       | 0.000214961 | 0.007591075 | 9           |
| GO:0048544 | recognition of pollen                   | BP       | 0.000263928 | 0.00833919  | 9           |
| GO:0043624 | cellular protein complex                | BP       | 0.001961645 | 0.040608303 | 9           |
|            | disassembly                             |          |             |             |             |
| GO:0080019 | fatty-acyl-CoA reductase                | MF       | 7.13271E-10 | 2.5692E-07  | 8           |
|            | (alcohol-forming) activity              |          |             |             |             |
| GO:0030042 | actin filament depolymerization         | BP       | 2.21586E-06 | 0.000249422 | 8           |

|            |                                                                                               |    |             |             |   |
|------------|-----------------------------------------------------------------------------------------------|----|-------------|-------------|---|
| GO:0003871 | 5-methyltetrahydropteroyltriglutamate-homocysteine S-methyltransferase activity               | MF | 3.64216E-06 | 0.000345239 | 8 |
| GO:0009086 | methionine biosynthetic process                                                               | BP | 5.77669E-06 | 0.000520191 | 8 |
| GO:0009678 | hydrogen-translocating pyrophosphatase activity                                               | MF | 1.94249E-06 | 0.000249422 | 7 |
| GO:0004523 | RNA-DNA hybrid ribonuclease activity                                                          | MF | 1.94249E-06 | 0.000249422 | 7 |
| GO:0003950 | NAD <sup>+</sup> ADP-ribosyltransferase activity                                              | MF | 1.11834E-05 | 0.000805655 | 7 |
| GO:0004427 | inorganic diphosphatase activity                                                              | MF | 4.25544E-05 | 0.002007944 | 7 |
| GO:0030321 | transepithelial chloride transport                                                            | BP | 0.002199364 | 0.043053925 | 7 |
| GO:0008113 | peptide-methionine (S)-S-oxidoreductase activity                                              | MF | 2.01358E-06 | 0.000249422 | 6 |
| GO:0031625 | ubiquitin protein ligase binding                                                              | MF | 3.39559E-05 | 0.001972728 | 6 |
| GO:0031461 | cullin-RING ubiquitin ligase complex                                                          | CC | 0.000403295 | 0.011099665 | 6 |
| GO:0016624 | oxidoreductase activity, acting on the aldehyde or oxo group of donors, disulfide as acceptor | MF | 0.000288205 | 0.008509136 | 5 |
| GO:0005730 | nucleolus                                                                                     | CC | 0.001787014 | 0.03924893  | 5 |
| GO:0003852 | 2-isopropylmalate synthase activity                                                           | MF | 9.17978E-06 | 0.000688866 | 4 |
| GO:0009098 | leucine biosynthetic process                                                                  | BP | 4.38813E-05 | 0.002007944 | 4 |
| GO:0031429 | box H/ACA snoRNP complex                                                                      | CC | 4.38813E-05 | 0.002007944 | 4 |
| GO:0006850 | mitochondrial pyruvate transport                                                              | BP | 0.000280832 | 0.008429636 | 4 |
| GO:0004602 | glutathione peroxidase activity                                                               | MF | 0.000924636 | 0.023128731 | 4 |
| GO:0000148 | 1,3-beta-D-glucan synthase complex                                                            | CC | 0.002215603 | 0.043053925 | 4 |
| GO:0006075 | (1->3)-beta-D-glucan biosynthetic process                                                     | BP | 0.002215603 | 0.043053925 | 4 |
| GO:0008241 | peptidyl-dipeptidase activity                                                                 | MF | 0.000166951 | 0.006659156 | 3 |

---

**Table S16. Go enrichment results for contracted genes in *A. truncatum*.**

| GO_ID      | GO_Term                                                                                               | GO_Class | Pvalue      | Adjusted Pvalue | Gene_Number |
|------------|-------------------------------------------------------------------------------------------------------|----------|-------------|-----------------|-------------|
| GO:0005488 | binding                                                                                               | MF       | 0.001224735 | 0.015433824     | 459         |
| GO:0003824 | catalytic activity                                                                                    | MF       | 0.000767117 | 0.012004113     | 375         |
| GO:0043167 | ion binding                                                                                           | MF       | 6.05711E-05 | 0.001627419     | 268         |
| GO:0046872 | metal ion binding                                                                                     | MF       | 0.000187665 | 0.004049007     | 141         |
| GO:0055114 | oxidation-reduction process                                                                           | BP       | 1.52291E-10 | 2.16863E-08     | 129         |
| GO:0016491 | oxidoreductase activity                                                                               | MF       | 4.52941E-08 | 3.22494E-06     | 128         |
| GO:0046914 | transition metal ion binding                                                                          | MF       | 2.36744E-05 | 0.000749162     | 96          |
| GO:0016705 | oxidoreductase activity, acting on paired donors, with incorporation or reduction of molecular oxygen | MF       | 3.54928E-19 | 2.52709E-16     | 66          |
| GO:0005506 | iron ion binding                                                                                      | MF       | 5.1146E-14  | 1.45664E-11     | 59          |
| GO:0020037 | heme binding                                                                                          | MF       | 6.53946E-11 | 1.33031E-08     | 57          |
| GO:0009055 | electron carrier activity                                                                             | MF       | 7.87919E-13 | 1.86999E-10     | 50          |
| GO:0043531 | ADP binding                                                                                           | MF       | 3.04669E-25 | 4.33848E-22     | 39          |
| GO:0004497 | monooxygenase activity                                                                                | MF       | 2.34938E-05 | 0.000749162     | 29          |
| GO:0016829 | lyase activity                                                                                        | MF       | 9.46905E-11 | 1.49821E-08     | 28          |
| GO:0016757 | transferase activity, transferring glycosyl groups                                                    | MF       | 0.003123367 | 0.035021064     | 28          |
| GO:0016758 | transferase activity, transferring hexosyl groups                                                     | MF       | 9.03521E-05 | 0.002297524     | 26          |
| GO:0016835 | carbon-oxygen lyase activity                                                                          | MF       | 1.66335E-09 | 2.15328E-07     | 21          |
| GO:0010333 | terpene synthase activity                                                                             | MF       | 1.50937E-17 | 7.1645E-15      | 18          |
| GO:0000287 | magnesium ion binding                                                                                 | MF       | 6.72147E-06 | 0.000258686     | 17          |
| GO:0005507 | copper ion binding                                                                                    | MF       | 2.72163E-05 | 0.000824596     | 16          |
| GO:0006457 | protein folding                                                                                       | BP       | 0.000136332 | 0.003081532     | 16          |
| GO:0003755 | peptidyl-prolyl cis-trans isomerase activity                                                          | MF       | 1.87739E-08 | 1.59168E-06     | 15          |
| GO:0016712 | oxidoreductase activity, acting on paired donors                                                      | MF       | 4.067E-05   | 0.001206545     | 13          |
| GO:0007156 | homophilic cell adhesion                                                                              | BP       | 0.001142326 | 0.014523858     | 13          |
| GO:0051213 | dioxygenase activity                                                                                  | MF       | 0.004505467 | 0.048975453     | 12          |
| GO:0004650 | polygalacturonase activity                                                                            | MF       | 1.4332E-06  | 6.37775E-05     | 11          |
| GO:0016706 | oxidoreductase activity, acting on paired donors, with incorporation or reduction of molecular oxygen | MF       | 0.001304524 | 0.016186741     | 11          |
| GO:0022414 | reproductive process                                                                                  | BP       | 0.001458979 | 0.017606667     | 10          |
| GO:0044703 | multi-organism reproductive process                                                                   | BP       | 0.001609227 | 0.019096158     | 8           |

|            |                                                       |                     |             |             |   |
|------------|-------------------------------------------------------|---------------------|-------------|-------------|---|
| GO:0008146 | sulfotransferase activity                             | MF                  | 3.38632E-09 | 4.01843E-07 | 7 |
| GO:0048544 | recognition of pollen                                 | BP                  | 0.000230028 | 0.004549442 | 7 |
| GO:0008171 | O-methyltransferase activity                          | MF                  | 0.000724779 | 0.011467612 | 6 |
| GO:0010181 | FMN binding                                           | MF                  | 0.003544788 | 0.038829068 | 5 |
| GO:0004144 | diacylglycerol<br>O-acyltransferase activity          | MF                  | 0.000109881 | 0.002565081 | 4 |
| GO:0019064 | fusion of virus membrane<br>with host plasma membrane | BP                  | 0.001022891 | 0.013241788 | 4 |
| GO:0046789 | host cell surface receptor<br>binding                 | MF                  | 0.001022891 | 0.013241788 | 4 |
| GO:0003968 | RNA-directed<br>polymerase activity                   | RNA<br>MF           | 0.00132995  | 0.016186741 | 4 |
| GO:0004970 | ionotropic glutamate receptor<br>activity             | MF                  | 0.00132995  | 0.016186741 | 4 |
| GO:0019031 | viral envelope                                        | CC                  | 0.002126459 | 0.024820311 | 4 |
| GO:0005234 | extracellular-glutamate-gated<br>ion channel activity | MF                  | 0.003202222 | 0.035624716 | 4 |
| GO:0004351 | glutamate<br>activity                                 | decarboxylase<br>MF | 0.000997672 | 0.013241788 | 2 |

**Table S17. GO enrichment results for the genes in *A. truncatum*-specific gene families.**

| GO_ID      | GO_Term                                         | GO_Class | Pvalue      | AdjustedPv  | Gene number |
|------------|-------------------------------------------------|----------|-------------|-------------|-------------|
| GO:0008194 | UDP-glycosyltransferase activity                | MF       | 0.000307838 | 0.034714635 | 9           |
| GO:0035251 | UDP-glycosyltransferase activity                | MF       | 4.19407E-05 | 0.006148512 | 8           |
| GO:0003843 | 1,3-beta-D-glucan synthase activity             | MF       | 6.14017E-09 | 3.469E-06   | 7           |
| GO:0051274 | beta-glucan biosynthetic process                | BP       | 7.27861E-05 | 0.009700403 | 7           |
| GO:0000148 | 1,3-beta-D-glucan synthase complex              | CC       | 9.46522E-09 | 3.469E-06   | 6           |
| GO:0006075 | (1->3)-beta-D-glucan<br>biosynthetic<br>process | BP       | 9.46522E-09 | 3.469E-06   | 6           |
| GO:0005730 | nucleolus                                       | CC       | 2.32706E-07 | 6.82294E-05 | 6           |
| GO:0004650 | polygalacturonase activity                      | MF       | 0.000386561 | 0.037779935 | 6           |
| GO:0031429 | box H/ACA snoRNP complex                        | CC       | 3.91238E-07 | 8.19363E-05 | 4           |



**Table S18. KEGG enrichment results for expanded genes in *A.truncatum*.**

| MapID    | MapTitle                                              | Pvalue      | AdjustedPv  | Gene_Number |
|----------|-------------------------------------------------------|-------------|-------------|-------------|
| map04626 | Plant-pathogen interaction                            | 7.01167E-05 | 0.000893988 | 58          |
| map04014 | Ras signaling pathway                                 | 1.29733E-27 | 2.64655E-25 | 56          |
| map00940 | Phenylpropanoid biosynthesis                          | 5.46096E-10 | 2.22807E-08 | 43          |
| map00941 | Flavonoid biosynthesis                                | 1.20338E-25 | 1.22744E-23 | 37          |
| map00062 | Fatty acid elongation                                 | 5.72091E-14 | 3.89022E-12 | 23          |
| map00910 | Nitrogen metabolism                                   | 3.72291E-10 | 1.89868E-08 | 21          |
| map00073 | Cutin, suberine and wax biosynthesis                  | 9.48272E-08 | 1.75861E-06 | 19          |
| map00945 | Stilbenoid, diarylheptanoid and gingerol biosynthesis | 2.91522E-08 | 6.60783E-07 | 18          |
| map00460 | Cyanoamino acid metabolism                            | 0.00321129  | 0.019267738 | 17          |
| map00750 | Vitamin B6 metabolism                                 | 3.52365E-09 | 1.02689E-07 | 16          |
| map00350 | Tyrosine metabolism                                   | 0.009863451 | 0.049076685 | 13          |
| map00909 | Sesquiterpenoid and triterpenoid biosynthesis         | 0.005271027 | 0.028297091 | 9           |
| map00591 | Linoleic acid metabolism                              | 0.000720599 | 0.005880088 | 8           |
| map00450 | Selenocompound metabolism                             | 0.001991129 | 0.012308799 | 8           |
| map00643 | Styrene degradation                                   | 0.000354078 | 0.003283269 | 5           |

**Table S19. Go enrichment results for expanded genes in *A. yangbiense*.**

| GO_ID      | GO_Term                                              | GO_Class | Pvalue   | AdjustedPv | Gene_Number |
|------------|------------------------------------------------------|----------|----------|------------|-------------|
| GO:0046914 | transition metal ion binding                         | MF       | 2.37E-71 | 6.58E-68   | 932         |
| GO:0004803 | transposase activity                                 | MF       | 2.16E-62 | 2E-59      | 126         |
| GO:0006313 | transposition,<br>DNA-mediated                       | BP       | 1.23E-60 | 6.82E-58   | 131         |
| GO:0008270 | zinc ion binding                                     | MF       | 5.84E-58 | 2.7E-55    | 683         |
| GO:0043531 | ADP binding                                          | MF       | 1.4E-54  | 5.53E-52   | 201         |
| GO:0015074 | DNA integration                                      | BP       | 7.7E-53  | 2.67E-50   | 111         |
| GO:0048544 | recognition of pollen                                | BP       | 1.19E-50 | 2.74E-48   | 122         |
| GO:0044703 | multi-organism<br>reproductive process               | BP       | 3.22E-40 | 4.7E-38    | 138         |
| GO:0046872 | metal ion binding                                    | MF       | 2.99E-38 | 4.15E-36   | 1087        |
| GO:0043169 | cation binding                                       | MF       | 4.27E-37 | 5.64E-35   | 1088        |
| GO:0022414 | reproductive process                                 | BP       | 1.48E-36 | 1.87E-34   | 139         |
| GO:0005488 | binding                                              | MF       | 3.28E-33 | 3.5E-31    | 3392        |
| GO:0006310 | DNA recombination                                    | BP       | 1.05E-28 | 9.42E-27   | 176         |
| GO:0046906 | tetrapyrrole binding                                 | MF       | 1.5E-26  | 1.19E-24   | 252         |
| GO:0020037 | heme binding                                         | MF       | 9.92E-24 | 6.72E-22   | 241         |
| GO:0003676 | nucleic acid binding                                 | MF       | 5.97E-22 | 3.95E-20   | 1182        |
| GO:0016705 | oxidoreductase activity,<br>acting on paired donors  | MF       | 4.89E-20 | 2.77E-18   | 224         |
| GO:0032501 | multicellular organismal<br>process                  | BP       | 2.31E-19 | 1.21E-17   | 196         |
| GO:0045735 | nutrient reservoir activity                          | MF       | 4.14E-19 | 2.13E-17   | 63          |
| GO:0044707 | single-multicellular<br>organism process             | BP       | 4.23E-19 | 2.13E-17   | 180         |
| GO:0006259 | DNA metabolic process                                | BP       | 6.64E-19 | 3.29E-17   | 412         |
| GO:0097159 | organic cyclic compound<br>binding                   | MF       | 5.39E-18 | 2.45E-16   | 1935        |
| GO:1901363 | heterocyclic compound<br>binding                     | MF       | 1.32E-17 | 5.63E-16   | 1931        |
| GO:0005506 | iron ion binding                                     | MF       | 3.96E-16 | 1.64E-14   | 203         |
| GO:0016758 | transferase activity,<br>transferring hexosyl groups | MF       | 8.39E-16 | 3.38E-14   | 205         |
| GO:0004970 | ionotropic glutamate<br>receptor activity            | MF       | 1.54E-15 | 6.03E-14   | 38          |
| GO:0015276 | ligand-gated ion channel<br>activity                 | MF       | 1.53E-14 | 5.59E-13   | 44          |
| GO:0005515 | protein binding                                      | MF       | 1.3E-13  | 4.53E-12   | 1518        |
| GO:0008234 | cysteine-type peptidase<br>activity                  | MF       | 1.6E-12  | 4.88E-11   | 97          |
| GO:0043167 | ion binding                                          | MF       | 2.12E-11 | 5.45E-10   | 1663        |

|            |                                                           |    |             |             |     |
|------------|-----------------------------------------------------------|----|-------------|-------------|-----|
| GO:0009733 | response to auxin                                         | BP | 4.31E-11    | 1.08E-09    | 53  |
| GO:0010309 | acireductone dioxygenase<br>[iron(II)-requiring] activity | MF | 5.75E-09    | 0.000000122 | 23  |
| GO:0022836 | gated channel activity                                    | MF | 1.55E-08    | 0.000000307 | 53  |
| GO:0004523 | RNA-DNA hybrid<br>ribonuclease activity                   | MF | 2.52E-08    | 0.000000483 | 21  |
| GO:0016757 | transferase activity,<br>transferring glycosyl groups     | MF | 2.95E-08    | 0.000000557 | 223 |
| GO:0000413 | protein peptidyl-prolyl<br>isomerization                  | BP | 3.16E-08    | 0.000000581 | 56  |
| GO:0003755 | peptidyl-prolyl cis-trans<br>isomerase activity           | MF | 3.16E-08    | 0.000000581 | 56  |
| GO:0034062 | RNA polymerase activity                                   | MF | 3.59E-08    | 0.000000656 | 115 |
| GO:0005216 | ion channel activity                                      | MF | 0.000000343 | 0.00000561  | 76  |
| GO:0004888 | transmembrane signaling<br>receptor activity              | MF | 0.000000351 | 0.0000057   | 56  |
| GO:0051704 | multi-organism process                                    | BP | 0.000000598 | 0.00000922  | 295 |
| GO:0003899 | DNA-directed RNA<br>polymerase activity                   | MF | 0.0000015   | 0.0000217   | 87  |
| GO:0016702 | oxidoreductase activity                                   | MF | 0.00000195  | 0.0000279   | 37  |
| GO:0008146 | sulfotransferase activity                                 | MF | 0.00000217  | 0.0000308   | 15  |
| GO:0016725 | oxidoreductase activity,<br>acting on CH or CH2<br>groups | MF | 0.00000217  | 0.0000308   | 15  |
| GO:0004650 | polygalacturonase activity                                | MF | 0.00000281  | 0.0000392   | 36  |
| GO:0007283 | spermatogenesis                                           | BP | 0.00000298  | 0.0000408   | 15  |
| GO:0016717 | oxidoreductase activity                                   | MF | 0.00000304  | 0.0000412   | 13  |
| GO:0009725 | response to hormone                                       | BP | 0.00000544  | 0.0000712   | 57  |
| GO:0016168 | chlorophyll binding                                       | MF | 0.00000681  | 0.000086    | 10  |
| GO:0018193 | peptidyl-amino acid<br>modification                       | BP | 0.00000726  | 0.0000904   | 58  |
| GO:0016701 | oxidoreductase activity                                   | MF | 0.00000742  | 0.0000915   | 45  |
| GO:0055114 | oxidation-reduction process                               | BP | 0.00000889  | 0.000108223 | 614 |
| GO:0004748 | ribonucleoside-diphosphate<br>reductase activity          | MF | 0.00000999  | 0.000119522 | 13  |
| GO:0015105 | arsenite transmembrane<br>transporter activity            | MF | 0.0000132   | 0.000155028 | 8   |
| GO:0015700 | arsenite transport                                        | BP | 0.0000132   | 0.000155028 | 8   |
| GO:0000723 | telomere maintenance                                      | BP | 0.0000232   | 0.000258538 | 23  |
| GO:0045300 | acyl-[acyl-carrier-protein]<br>desaturase activity        | MF | 0.0000253   | 0.000277704 | 9   |
| GO:0006784 | heme a biosynthetic process                               | BP | 0.0000332   | 0.000357347 | 11  |
| GO:0010033 | response to organic                                       | BP | 0.0000634   | 0.000609258 | 59  |

|            |                               |    |             |             |     |  |
|------------|-------------------------------|----|-------------|-------------|-----|--|
|            | substance                     |    |             |             |     |  |
| GO:0019013 | viral nucleocapsid            | CC | 0.000075    | 0.000710877 | 27  |  |
| GO:0051213 | dioxygenase activity          | MF | 0.000082    | 0.000771205 | 39  |  |
| GO:0016491 | oxidoreductase activity       | MF | 0.0000934   | 0.000867116 | 619 |  |
| GO:0009289 | pilus                         | CC | 0.0000967   | 0.000888965 | 11  |  |
| GO:0003677 | DNA binding                   | MF | 0.000101952 | 0.000930985 | 668 |  |
|            | sequence-specific DNA         |    |             |             |     |  |
| GO:0000981 | binding RNA polymerase II     | MF | 0.000197423 | 0.001686293 | 13  |  |
|            | transcription factor activity |    |             |             |     |  |
| GO:0005173 | stem cell factor receptor     | MF | 0.000338845 | 0.002766568 | 9   |  |
|            | binding                       |    |             |             |     |  |
| GO:0030639 | polyketide biosynthetic       | BP | 0.000364424 | 0.002915395 | 8   |  |
|            | process                       |    |             |             |     |  |
| GO:0009318 | exodeoxyribonuclease VII      | CC | 0.000364424 | 0.002915395 | 8   |  |
|            | complex                       |    |             |             |     |  |
| GO:0038023 | signaling receptor activity   | MF | 0.000425649 | 0.003361409 | 68  |  |
| GO:0047134 | protein-disulfide reductase   | MF | 0.000427441 | 0.003361409 | 21  |  |
|            | activity                      |    |             |             |     |  |
| GO:0009767 | photosynthetic electron       | BP | 0.000529747 | 0.004073623 | 11  |  |
|            | transport chain               |    |             |             |     |  |
| GO:0004872 | receptor activity             | MF | 0.000842189 | 0.006217866 | 74  |  |
| GO:0016984 | ribulose-bisphosphate         | MF | 0.000894494 | 0.00656909  | 5   |  |
|            | carboxylase activity          |    |             |             |     |  |
| GO:0004867 | serine-type endopeptidase     | MF | 0.000989441 | 0.007190285 | 20  |  |
|            | inhibitor activity            |    |             |             |     |  |
| GO:0007131 | reciprocal meiotic            | BP | 0.001046767 | 0.007528048 | 8   |  |
|            | recombination                 |    |             |             |     |  |
| GO:0006308 | DNA catabolic process         | BP | 0.00188296  | 0.013067743 | 9   |  |
| GO:0010277 | chlorophyllide a oxygenase    | MF | 0.002462613 | 0.016714457 | 8   |  |
|            | [overall] activity            |    |             |             |     |  |
| GO:0009611 | response to wounding          | BP | 0.002931785 | 0.019527739 | 30  |  |
| GO:0009507 | chloroplast                   | CC | 0.00339389  | 0.022220376 | 11  |  |
| GO:0042627 | chylomicron                   | CC | 0.003642443 | 0.02308544  | 4   |  |
| GO:0015485 | cholesterol binding           | MF | 0.003642443 | 0.02308544  | 4   |  |
|            | hydroxymethylglutaryl-Co      |    |             |             |     |  |
| GO:0004420 | A reductase (NADPH)           | MF | 0.003642443 | 0.02308544  | 4   |  |
|            | activity                      |    |             |             |     |  |
| GO:0015385 | sodium:proton antiporter      | MF | 0.004268802 | 0.026451328 | 5   |  |
|            | activity                      |    |             |             |     |  |
| GO:0010333 | terpene synthase activity     | MF | 0.004479536 | 0.02739029  | 26  |  |
| GO:0007127 | meiosis I                     | BP | 0.006595219 | 0.03895389  | 9   |  |
| GO:0007276 | gamete generation             | BP | 0.006701728 | 0.039323766 | 16  |  |
| GO:0005246 | calcium channel regulator     | MF | 0.006813664 | 0.039323766 | 7   |  |

|            |                                            |    |             |             |    |
|------------|--------------------------------------------|----|-------------|-------------|----|
|            | activity                                   |    |             |             |    |
| GO:0004026 | alcohol O-acetyltransferase activity       | MF | 0.006813664 | 0.039323766 | 7  |
| GO:0007016 | cytoskeletal anchoring at plasma membrane  | BP | 0.006813664 | 0.039323766 | 7  |
| GO:0004656 | procollagen-proline 4-dioxygenase activity | MF | 0.006813664 | 0.039323766 | 7  |
| GO:0098519 | nucleotide phosphatase activity            | MF | 0.008192751 | 0.046796452 | 34 |

**Table S20. Go enrichment results for contracted genes in *A. yangbiense*.**

| GO_ID      | GO_Term                                        | GO_Class | Pvalue   | AdjustedPv  | Gene_Number |
|------------|------------------------------------------------|----------|----------|-------------|-------------|
| GO:0043531 | ADP binding                                    | MF       | 8.09E-73 | 1.31E-69    | 48          |
| GO:0030246 | carbohydrate binding                           | MF       | 2.16E-53 | 1.75E-50    | 44          |
| GO:0016747 | transferase activity                           | MF       | 2.26E-27 | 1.23E-24    | 43          |
| GO:0004713 | protein tyrosine kinase activity               | MF       | 7.41E-19 | 3.01E-16    | 77          |
| GO:0016746 | transferase activity, transferring acyl groups | MF       | 1.4E-16  | 4.55E-14    | 44          |
| GO:0006633 | fatty acid biosynthetic process                | BP       | 9.38E-15 | 2.31E-12    | 23          |
| GO:0004672 | protein kinase activity                        | MF       | 9.93E-15 | 2.31E-12    | 92          |
| GO:0006631 | fatty acid metabolic process                   | BP       | 3.97E-13 | 7.17E-11    | 24          |
| GO:0048544 | recognition of pollen                          | BP       | 8.22E-12 | 1.03E-09    | 15          |
| GO:0006468 | protein phosphorylation                        | BP       | 1.13E-11 | 1.31E-09    | 88          |
| GO:0016762 | xyloglucan:xyloglucosyl transferase activity   | MF       | 2.18E-10 | 2.08E-08    | 11          |
| GO:0048046 | apoplast                                       | CC       | 2.18E-10 | 2.08E-08    | 11          |
| GO:0016740 | transferase activity                           | MF       | 2.27E-09 | 0.000000205 | 195         |
| GO:0030554 | adenyl nucleotide binding                      | MF       | 2.45E-09 | 0.00000021  | 179         |
| GO:0016310 | phosphorylation                                | BP       | 3.31E-09 | 0.000000269 | 92          |
| GO:0004523 | RNA-DNA hybrid ribonuclease activity           | MF       | 4.88E-09 | 0.000000378 | 8           |
| GO:0032559 | adenyl ribonucleotide binding                  | MF       | 7.19E-09 | 0.000000532 | 175         |
| GO:0046394 | carboxylic acid biosynthetic process           | BP       | 1.22E-08 | 0.0000008   | 33          |
| GO:0017076 | purine nucleotide binding                      | MF       | 1.23E-08 | 0.0000008   | 205         |
| GO:0032555 | purine ribonucleotide                          | MF       | 1.64E-08 | 0.000000981 | 201         |

|            |                                                                                 |    |             |             |     |  |
|------------|---------------------------------------------------------------------------------|----|-------------|-------------|-----|--|
|            | binding                                                                         |    |             |             |     |  |
| GO:0032550 | purine ribonucleoside binding                                                   | MF | 1.69E-08    | 0.000000981 | 200 |  |
| GO:0016773 | phosphotransferase activity, alcohol group as acceptor                          | MF | 0.000000038 | 0.00000193  | 95  |  |
| GO:0016301 | kinase activity                                                                 | MF | 6.35E-08    | 0.00000304  | 101 |  |
| GO:0043412 | macromolecule modification                                                      | BP | 7.38E-08    | 0.00000343  | 100 |  |
| GO:0006464 | cellular protein modification process                                           | BP | 9.88E-08    | 0.00000423  | 95  |  |
| GO:0030042 | actin filament depolymerization                                                 | BP | 0.00000014  | 0.00000568  | 8   |  |
| GO:0009678 | hydrogen-translocating pyrophosphatase activity                                 | MF | 0.000000166 | 0.00000638  | 7   |  |
| GO:0000166 | nucleotide binding                                                              | MF | 0.000000169 | 0.00000638  | 213 |  |
| GO:0005488 | binding                                                                         | MF | 0.000000636 | 0.000023    | 577 |  |
| GO:0030036 | actin cytoskeleton organization                                                 | BP | 0.00000242  | 0.0000839   | 16  |  |
| GO:0004427 | inorganic diphosphatase activity                                                | MF | 0.00000398  | 0.000124336 | 7   |  |
| GO:0003871 | 5-methyltetrahydropteroyltryglutamate-homocysteine S-methyltransferase activity | MF | 0.00000398  | 0.000124336 | 7   |  |
| GO:0006073 | cellular glucan metabolic process                                               | BP | 0.00000553  | 0.000166566 | 16  |  |
| GO:0043168 | anion binding                                                                   | MF | 0.00000564  | 0.000166628 | 208 |  |
| GO:0009086 | methionine biosynthetic process                                                 | BP | 0.00000592  | 0.000171751 | 7   |  |
| GO:0005618 | cell wall                                                                       | CC | 0.00000647  | 0.00018468  | 16  |  |
| GO:0031429 | box H/ACA snoRNP complex                                                        | CC | 0.0000104   | 0.000271884 | 4   |  |
| GO:0005856 | cytoskeleton                                                                    | CC | 0.0000118   | 0.000304912 | 53  |  |
| GO:0005515 | protein binding                                                                 | MF | 0.0000137   | 0.000347269 | 229 |  |
| GO:0044264 | cellular polysaccharide metabolic process                                       | BP | 0.0000181   | 0.000446959 | 17  |  |
| GO:0000160 | phosphorelay signal transduction system                                         | BP | 0.0000284   | 0.00067969  | 11  |  |
| GO:0006796 | phosphate-containing compound metabolic process                                 | BP | 0.0000776   | 0.001752006 | 115 |  |
| GO:0009067 | aspartate family amino                                                          | BP | 0.000079    | 0.001759818 | 8   |  |

|            |                                                               |    |             |             |     |  |
|------------|---------------------------------------------------------------|----|-------------|-------------|-----|--|
|            | acid biosynthetic process                                     |    |             |             |     |  |
|            | Ttransferring                                                 |    |             |             |     |  |
| GO:0016772 | phosphorus-containing groups                                  | MF | 0.0000973   | 0.002080798 | 112 |  |
| GO:0005452 | inorganic anion exchanger activity                            | MF | 0.000134525 | 0.002804331 | 16  |  |
| GO:0043624 | cellular protein complex disassembly                          | BP | 0.000142659 | 0.002828816 | 9   |  |
| GO:0004602 | glutathione peroxidase activity                               | MF | 0.000230886 | 0.004416721 | 4   |  |
| GO:0015405 | P-P-bond-hydrolysis-driven transmembrane transporter activity | MF | 0.000242776 | 0.004537392 | 23  |  |
| GO:0005730 | nucleolus                                                     | CC | 0.000343401 | 0.006345118 | 5   |  |
| GO:0000148 | 1,3-beta-D-glucan synthase complex                            | CC | 0.000568618 | 0.010049703 | 4   |  |
| GO:0006075 | (1->3)-beta-D-glucan biosynthetic process                     | BP | 0.000568618 | 0.010049703 | 4   |  |
| GO:0043167 | ion binding                                                   | MF | 0.000834611 | 0.013939755 | 310 |  |
| GO:0044255 | cellular lipid metabolic process                              | BP | 0.001073147 | 0.017625625 | 26  |  |
| GO:0032787 | monocarboxylic acid metabolic process                         | BP | 0.001247597 | 0.020085075 | 28  |  |
| GO:0006026 | aminoglycan catabolic process                                 | BP | 0.001417589 | 0.022598034 | 6   |  |
| GO:0007010 | cytoskeleton organization                                     | BP | 0.001505952 | 0.023414636 | 25  |  |
| GO:0008154 | actin polymerization or depolymerization                      | BP | 0.001512015 | 0.023414636 | 9   |  |
| GO:1901363 | heterocyclic compound binding                                 | MF | 0.001590837 | 0.024402834 | 350 |  |
| GO:0008171 | O-methyltransferase activity                                  | MF | 0.001946788 | 0.028920648 | 6   |  |
| GO:0004553 | hydrolase activity, hydrolyzing O-glycosyl compounds          | MF | 0.001956501 | 0.028920648 | 36  |  |
| GO:0035556 | intracellular signal transduction                             | BP | 0.002306731 | 0.033790497 | 27  |  |
| GO:0097159 | organic cyclic compound binding                               | MF | 0.002375685 | 0.03418463  | 350 |  |
| GO:0003682 | chromatin binding                                             | MF | 0.002764538 | 0.039431048 | 21  |  |
| GO:0016712 | oxidoreductase activity,                                      | MF | 0.003091261 | 0.043113172 | 11  |  |
| GO:0016798 | hydrolase activity, acting                                    | MF | 0.003127957 | 0.043113172 | 37  |  |

|            |                                     |    |             |             |   |
|------------|-------------------------------------|----|-------------|-------------|---|
|            | on glycosyl bonds                   |    |             |             |   |
| GO:0004568 | chitinase activity                  | MF | 0.003261328 | 0.043113172 | 5 |
| GO:0006032 | chitin catabolic process            | BP | 0.003261328 | 0.043113172 | 5 |
| GO:0003843 | 1,3-beta-D-glucan synthase activity | MF | 0.003413191 | 0.044756844 | 4 |

**Table S21. KEGG enrichment results for expanded genes in *A. yangbiense*.**

| MapID    | MapTitle                                              | Pvalue      | AdjustedPv  | Gene_Number |
|----------|-------------------------------------------------------|-------------|-------------|-------------|
| map04110 | Cell cycle                                            | 1.25E-75    | 4.54E-74    | 344         |
| map04626 | Plant-pathogen interaction                            | 9.59E-58    | 2.79E-56    | 449         |
| map00903 | Limonene and pinene degradation                       | 5.44E-35    | 1.32E-33    | 103         |
| map00460 | Cyanoamino acid metabolism                            | 1.16E-28    | 2.6E-27     | 146         |
| map00624 | Polycyclic aromatic hydrocarbon degradation           | 3.69E-24    | 7.66E-23    | 72          |
| map00363 | Bisphenol degradation                                 | 1.23E-23    | 2.38E-22    | 67          |
| map00627 | Aminobenzoate degradation                             | 1.68E-20    | 2.88E-19    | 78          |
| map03020 | RNA polymerase                                        | 2.75E-19    | 4.45E-18    | 97          |
| map00943 | Isoflavonoid biosynthesis                             | 2.32E-14    | 3.22E-13    | 39          |
| map00945 | Stilbenoid, diarylheptanoid and gingerol biosynthesis | 2.1E-12     | 2.28E-11    | 76          |
| map00950 | Isoquinoline alkaloid biosynthesis                    | 7.04E-11    | 6.4E-10     | 69          |
| map00942 | Anthocyanin biosynthesis                              | 9.15E-11    | 8.06E-10    | 27          |
| map03018 | RNA degradation                                       | 1.23E-10    | 1.05E-09    | 154         |
| map00140 | Steroid hormone biosynthesis                          | 1.91E-10    | 1.59E-09    | 76          |
| map00940 | Phenylpropanoid biosynthesis                          | 5.3E-10     | 4.28E-09    | 172         |
| map00966 | Glucosinolate biosynthesis                            | 2.3E-09     | 1.72E-08    | 20          |
| map02010 | ABC transporters                                      | 2.59E-08    | 0.000000171 | 107         |
| map00380 | Tryptophan metabolism                                 | 0.000000104 | 0.000000605 | 55          |
| map00944 | Flavone and flavonol biosynthesis                     | 0.000000979 | 0.00000459  | 21          |
| map00350 | Tyrosine metabolism                                   | 0.000002    | 0.00000925  | 69          |
| map00625 | Chloroalkane and chloroalkene degradation             | 0.00000248  | 0.0000113   | 42          |
| map00340 | Histidine metabolism                                  | 0.000003    | 0.0000132   | 36          |
| map00410 | beta-Alanine metabolism                               | 0.00000908  | 0.0000367   | 69          |
| map02020 | Two-component system                                  | 0.0000119   | 0.0000469   | 29          |
| map00190 | Oxidative phosphorylation                             | 0.0000246   | 0.0000944   | 92          |
| map00071 | Fatty acid degradation                                | 0.0000464   | 0.000160842 | 42          |
| map00040 | Pentose and glucuronate interconversions              | 0.0000534   | 0.000180588 | 125         |
| map03320 | PPAR signaling pathway                                | 0.000234972 | 0.000697724 | 32          |



|          |                                                        |             |             |     |
|----------|--------------------------------------------------------|-------------|-------------|-----|
| map03008 | Ribosome biogenesis in eukaryotes                      | 0.000333736 | 0.000957837 | 80  |
| map00908 | Zeatin biosynthesis                                    | 0.000711345 | 0.001916678 | 22  |
| map00053 | Ascorbate and aldarate metabolism                      | 0.000979026 | 0.002543719 | 50  |
| map00960 | Tropane, piperidine and pyridine alkaloid biosynthesis | 0.001214326 | 0.003020246 | 46  |
| map00901 | Indole alkaloid biosynthesis                           | 0.001561423 | 0.003786451 | 10  |
| map00480 | Glutathione metabolism                                 | 0.001683074 | 0.004047722 | 64  |
| map00330 | Arginine and proline metabolism                        | 0.002505086 | 0.005564732 | 47  |
| map00240 | Pyrimidine metabolism                                  | 0.003086864 | 0.006805132 | 104 |
| map00310 | Lysine degradation                                     | 0.005026666 | 0.010374183 | 36  |
| map00591 | Linoleic acid metabolism                               | 0.010101875 | 0.019597637 | 16  |
| map00643 | Styrene degradation                                    | 0.010512425 | 0.020125761 | 11  |
| map00730 | Thiamine metabolism                                    | 0.01658878  | 0.029798363 | 26  |
| map00280 | Valine, leucine and isoleucine degradation             | 0.024037992 | 0.040906758 | 43  |
| map00980 | Metabolism of xenobiotics by cytochrome P450           | 0.028726579 | 0.047228444 | 36  |

**Table S22. A summary of Drought-tolerant genes identified in *A. truncatum* and other published genomes.**

| Genes  | <i>A.truncatum</i> | <i>A.yangbiense</i> | <i>A. thaliana</i> | <i>C. sinensis</i> | <i>M. oleifera</i> | <i>S. indicum</i> |
|--------|--------------------|---------------------|--------------------|--------------------|--------------------|-------------------|
| APX    | 16                 | 16                  | 20                 | 18                 | 13                 | 22                |
| DHA    | 4                  | 1                   | 6                  | 4                  | 3                  | 5                 |
| GCL    | 4                  | 8                   | 3                  | 2                  | 2                  | 4                 |
| GLO    | 24                 | 23                  | 18                 | 16                 | 11                 | 11                |
| GR     | 12                 | 12                  | 16                 | 16                 | 12                 | 28                |
| GSH-Px | 5                  | 4                   | 8                  | 5                  | 5                  | 6                 |
| MDHAR  | 3                  | 3                   | 5                  | 3                  | 2                  | 3                 |
| MSR    | 8                  | 3                   | 4                  | 2                  | 1                  | 3                 |
| POD    | 57                 | 78                  | 73                 | 72                 | 54                 | 84                |
| AQP1   | 13                 | 9                   | 9                  | 8                  | 8                  | 11                |
| LEA    | 82                 | 68                  | 50                 | 72                 | 55                 | 74                |
| LEW    | 12                 | 9                   | 10                 | 9                  | 10                 | 9                 |
| NLM    | 7                  | 10                  | 9                  | 8                  | 6                  | 8                 |
| OSM    | 6                  | 10                  | 2                  | 3                  | 4                  | 12                |
| PIP    | 7                  | 10                  | 19                 | 11                 | 8                  | 14                |
| SIP    | 3                  | 2                   | 3                  | 2                  | 2                  | 3                 |

|        |    |    |    |    |    |    |
|--------|----|----|----|----|----|----|
| SOS1   | 1  | 1  | 2  | 1  | 0  | 1  |
| TIP    | 14 | 9  | 11 | 9  | 9  | 12 |
| ACP    | 3  | 4  | 4  | 3  | 1  | 4  |
| ALAT   | 2  | 2  | 4  | 2  | 2  | 5  |
| AST    | 7  | 7  | 5  | 6  | 5  | 4  |
| CHI    | 2  | 2  | 3  | 1  | 2  | 2  |
| GOGAT  | 1  | 1  | 2  | 1  | 0  | 1  |
| MDH    | 6  | 5  | 5  | 5  | 3  | 5  |
| MS     | 5  | 2  | 3  | 3  | 2  | 2  |
| NAD-ME | 2  | 2  | 2  | 2  | 1  | 2  |
| NIR    | 1  | 1  | 1  | 1  | 1  | 2  |
| NR     | 1  | 0  | 2  | 1  | 0  | 1  |
| PCK    | 2  | 2  | 2  | 2  | 2  | 2  |
| PEPC1  | 6  | 4  | 3  | 3  | 4  | 4  |
| PPDK   | 1  | 1  | 1  | 1  | 1  | 1  |
| SAH    | 1  | 1  | 2  | 1  | 1  | 3  |
| SAMS   | 1  | 5  | 4  | 4  | 4  | 4  |
| AFL1   | 0  | 0  | 1  | 0  | 0  | 0  |
| COMT   | 9  | 14 | 2  | 28 | 2  | 3  |
| GRP    | 14 | 9  | 31 | 11 | 12 | 17 |
| LOX    | 5  | 12 | 6  | 10 | 8  | 15 |
| MDA1   | 1  | 1  | 1  | 1  | 1  | 1  |
| PAE    | 10 | 12 | 14 | 9  | 7  | 11 |
| PAL    | 2  | 8  | 4  | 4  | 5  | 8  |
| PGIP   | 0  | 0  | 3  | 1  | 0  | 0  |
| PLD    | 3  | 3  | 3  | 2  | 3  | 5  |
| RGP    | 3  | 3  | 5  | 5  | 7  | 8  |
| XI     | 4  | 5  | 10 | 5  | 2  | 8  |
| XTH    | 25 | 10 | 33 | 31 | 30 | 36 |
| BADH   | 1  | 1  | 2  | 1  | 0  | 2  |
| COD1   | 0  | 0  | 1  | 0  | 0  | 0  |
| DMT    | 4  | 2  | 5  | 2  | 2  | 2  |
| P5CDH  | 1  | 1  | 1  | 1  | 0  | 1  |
| P5CR   | 2  | 2  | 1  | 1  | 1  | 1  |
| P5CS   | 1  | 1  | 2  | 2  | 2  | 2  |
| PEAMT  | 1  | 1  | 1  | 1  | 0  | 2  |
| ProDH  | 1  | 1  | 2  | 1  | 1  | 2  |
| SPS    | 5  | 4  | 6  | 5  | 2  | 5  |
| SUS    | 12 | 6  | 9  | 7  | 7  | 7  |
| TPS    | 10 | 8  | 10 | 8  | 11 | 10 |

---

**Table S23. A summary of drought-tolerant transcription factors identified in *A. truncatum* and other published genomes.**

| Genes  | <i>A. truncatum</i> | <i>A.yangbiense</i> | <i>A. thaliana</i> | <i>C. sinensis</i> | <i>M. oleifera</i> | <i>S. indicum</i> |
|--------|---------------------|---------------------|--------------------|--------------------|--------------------|-------------------|
| ADH    | 6                   | 5                   | 7                  | 9                  | 10                 | 8                 |
| AREB   | 0                   | 1                   | 5                  | 2                  | 4                  | 1                 |
| COR    | 0                   | 0                   | 2                  | 0                  | 0                  | 0                 |
| DREB   | 6                   | 9                   | 9                  | 6                  | 3                  | 7                 |
| EIL1   | 4                   | 3                   | 3                  | 4                  | 2                  | 5                 |
| HARDY  | 5                   | 5                   | 5                  | 9                  | 1                  | 4                 |
| KIN    | 43                  | 33                  | 47                 | 37                 | 31                 | 38                |
| MYB    | 19                  | 16                  | 28                 | 19                 | 15                 | 19                |
| NAC3   | 15                  | 3                   | 27                 | 24                 | 3                  | 18                |
| NAC6   | 30                  | 7                   | 50                 | 34                 | 7                  | 42                |
| RD22   | 1                   | 1                   | 1                  | 1                  | 1                  | 1                 |
| RD29B  | 0                   | 0                   | 1                  | 0                  | 0                  | 0                 |
| WRKY   | 2                   | 2                   | 11                 | 5                  | 7                  | 2                 |
| bZIP23 | 1                   | 1                   | 3                  | 2                  | 2                  | 2                 |

**Table S24. The gene copy number of VLCFA biosynthesis in 12 plants.**

| GeneID | <i>A.truncatum</i> | <i>A.yangbiense</i> | <i>A.thaliana</i> | <i>C.sinensis</i> | <i>G.max</i> | <i>G.raimondii</i> | <i>H.annuus</i> | <i>M.oleifera</i> | <i>O.europae</i> | <i>S.indicum</i> | <i>S.lycopersicum</i> | <i>X.sorbifolium</i> |
|--------|--------------------|---------------------|-------------------|-------------------|--------------|--------------------|-----------------|-------------------|------------------|------------------|-----------------------|----------------------|
| ACC    | 1                  | 1                   | 2                 | 0                 | 2            | 2                  | 2               | 0                 | 1                | 1                | 1                     | 1                    |
| a-CT   | 1                  | 2                   | 1                 | 1                 | 3            | 2                  | 3               | 0                 | 3                | 3                | 1                     | 0                    |
| BCCP   | 2                  | 2                   | 2                 | 2                 | 5            | 4                  | 2               | 2                 | 4                | 1                | 2                     | 0                    |
| BC     | 1                  | 1                   | 1                 | 1                 | 2            | 2                  | 2               | 0                 | 1                | 1                | 1                     | 1                    |
| b-CT   | 0                  | 1                   | 1                 | 0                 | 0            | 0                  | 0               | 0                 | 0                | 0                | 1                     | 0                    |
| ECR    | 3                  | 2                   | 1                 | 1                 | 2            | 2                  | 3               | 1                 | 2                | 1                | 1                     | 1                    |
| ER     | 3                  | 3                   | 2                 | 2                 | 5            | 4                  | 5               | 4                 | 4                | 4                | 5                     | 2                    |
| FATA   | 2                  | 1                   | 2                 | 1                 | 1            | 3                  | 1               | 0                 | 2                | 1                | 1                     | 1                    |
| FATB   | 1                  | 1                   | 1                 | 1                 | 4            | 4                  | 3               | 1                 | 1                | 1                | 1                     | 2                    |
| HAD    | 3                  | 3                   | 3                 | 1                 | 7            | 3                  | 3               | 2                 | 2                | 2                | 3                     | 2                    |
| HCD    | 2                  | 2                   | 2                 | 2                 | 3            | 2                  | 3               | 1                 | 3                | 3                | 2                     | 2                    |
| KAR    | 3                  | 3                   | 7                 | 4                 | 6            | 4                  | 9               | 2                 | 4                | 8                | 7                     | 2                    |
| KASIII | 1                  | 1                   | 1                 | 0                 | 3            | 2                  | 3               | 0                 | 2                | 2                | 2                     | 0                    |
| KASII  | 1                  | 1                   | 2                 | 5                 | 7            | 8                  | 9               | 3                 | 8                | 6                | 5                     | 0                    |
| KASI   | 2                  | 2                   | 2                 | 3                 | 8            | 7                  | 9               | 2                 | 8                | 6                | 5                     | 1                    |
| KCR    | 1                  | 4                   | 2                 | 2                 | 3            | 3                  | 4               | 2                 | 4                | 3                | 2                     | 2                    |
| KCS    | 28                 | 22                  | 21                | 15                | 31           | 26                 | 33              | 19                | 28               | 21               | 17                    | 13                   |
| LACS   | 9                  | 7                   | 9                 | 7                 | 20           | 12                 | 13              | 5                 | 11               | 9                | 9                     | 2                    |
| MCMT   | 1                  | 1                   | 1                 | 1                 | 2            | 1                  | 2               | 1                 | 0                | 1                | 1                     | 1                    |
| SAD    | 3                  | 10                  | 7                 | 6                 | 5            | 8                  | 2               | 6                 | 5                | 7                | 7                     | 4                    |

**Table S25. Expression levels significantly up-regulated between 85 DAF and 100DAF in the fatty acid elongation stage of the VLCFA biosynthesis pathway.**

| GENE_ID        | readcount_100DAF | readcount_85DAF | log2FoldChange | p-value  |
|----------------|------------------|-----------------|----------------|----------|
| Atru.chr4.2307 | 117.7472816      | 4.410290476     | 4.7387         | 3.15E-16 |
| Atru.chr4.2308 | 8356.115812      | 439.3283629     | 4.2495         | 1.12E-87 |
| Atru.chr4.2311 | 4979.706479      | 512.3433797     | 3.2809         | 3.32E-10 |

**Table S26. The transcription factors (TF)/transcription regulatory factors (TR) in black module of WGCNA analysis.**

| Module | TF/TR | Family      | Gene ID                                                        |
|--------|-------|-------------|----------------------------------------------------------------|
| black  | TF    | MYB-related | Atru.chr1.3799, Atru.chr8.1841, Atru.chr3.3572                 |
|        | TF    | Alfin-like  | Atru.chr1.3876                                                 |
|        | TF    | Trihelix    | Atru.chr11.2229.1                                              |
|        | TF    | WRKY        | Atru.chr12.201, Atru.chr12.202, Atru.chr9.2017, Atru.chr4.3047 |
|        | TF    | C3H         | Atru.chr13.328                                                 |
|        | TF    | LOB         | Atru.chr3.3711                                                 |
|        | TF    | B3          | Atru.chr5.2849.2                                               |
|        | TF    | NAC         | Atru.chr5.3491                                                 |
|        | TF    | bZIP        | Atru.chr5.613                                                  |
|        | TF    | ERF         | Atru.chr5.683                                                  |
|        | TR    | MBF1        | Atru.chr7.1330                                                 |
|        | TF    | ERF         | Atru.chr7.2513                                                 |

**Table S27. List of *KCS* gene-specific primer (5' - 3') used for real-time RT-PCR.**

| gene name      | Forward primer          | Reverse primer             |
|----------------|-------------------------|----------------------------|
| Atru.chr4.2308 | TTGGGCAAATGACTTACGGG    | AATCATTGCCGATAAAGACG       |
| Atru.chr4.2307 | TCCAAACTTCTTCCTCTCTG    | AGACAAAGGCAACAGAGCAT       |
| Atru.chr4.2311 | TTCATCCCAACTACTATGCG    | TCGGTTGGAGAGGAGGATGG       |
| Atru.chr4.2309 | GTTGATGCAGGTCCTCATA     | CTAGGCTTCACTCCAGTTTT       |
| Atru.chr4.2822 | TGGATGCGAGAAAGGAGACA    | CTGATAAAGACGGCGTTGGA       |
| Actin          | ATCATGTTTGAGACCTTCAACAC | GATCTTCATGAGGTAGTCAGTCAGGT |

**Table S28. List of *LEA* gene-specific primer (5' - 3') used for real-time RT-PCR.**

| Gene name               | Forward primer           | Reverse primer        |
|-------------------------|--------------------------|-----------------------|
| LEA1-Atru.chr6.1738     | AAGCAGCAGCGAGGACAGAG     | GGTCACCGCCAGATGGGATT  |
| LEA2-Atru.chr3.1961     | GATTACGAGGTTTGGCTGTC     | TTGTTCTTCTTGAGGCGAGT  |
| LEA2-Atru.chr10.2344    | CATGCCCTTTCCTTCCCTAA     | TCATCGTGCTTGACTTCCTG  |
| LEA2-Atru.chr1.3277     | ATCATCACAGTCATCATCCTCCTC | CGTGTCTAGCTTCTCCTCCT  |
| LEA3-Atru.chr12.2033    | CTCCTCCTACGGCTCAACTC     | CAGGCTTTCTCCTCCAACAC  |
| LEA4-Atru.chr6.2817     | AACAGCAAGGTCGTCCACAG     | CAGTTCACGACCAAGTTTA   |
| LEA5-Atru.chr12.68      | ATGTTAGTGTTACGGAGGTTTGA  | CCTAGCCTTGGTGTCGAGTT  |
| SMP-Atru.chr5.1467      | TCTCACCGACATCACCAGAG     | AGTTGCCACATTAGGCTTTG  |
| Dehydrin-Atru.chr5.3081 | GGATGATGGGCAAGGTGGAA     | AGGCAACGGTTGTGGTCTGT  |
| Dehydrin-Atru.chr3.677  | TGGGATACGGAAGAAGAAGG     | GACAGGAGTAGTGGTGGTTGC |
